# Supplementary material
Source: MDPI journal article supplement (https://www.mdpi.com/2078-1547/9/1/22)

### **Legend to Supplementary Figure**

**Figure S1. ARTD10 overexpression does not affect GAPDH activity.** The graph shows the GAPDH enzymatic activity measured in CHO cells non-transfected (Control) or transiently transfected with HA-ARTD10 or ARTD10-G888W. Data are means  $\pm$ SD of three independent experiments, each performed in triplicate.

**Supplementary Figure 1**

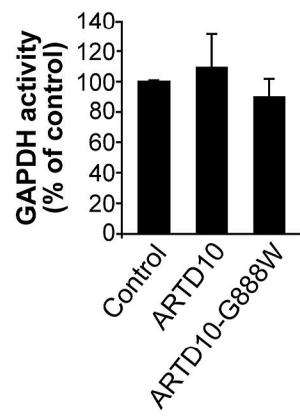

Supplement: s1 [file s1 › SupplementaryFigure1.pdf]
